# Supplementary material
Source: publisher figshare collection journal article supplement (https://acs.figshare.com/ndownloader/files/3894190)
Supplement: Supplementary file 1 [file 3894190]

# Supplemental material

## Fluorite $\text{TiO}_2(111)$ Surface Phase for Enhanced Visible-Light Solar Energy

### Conversion

State Key Laboratory of Organic-Inorganic Composites,

Beijing University of Chemical Technology, Beijing 100029, China

Mang Niu, Daojian Cheng, and Dapeng Cao

#### 1. Atomic structures of high-pressure $\text{TiO}_2$ phases.

The atomic structure of the baddeleyite, columbite, orthorhombic, cotunnite, pyrite, and fluorite  $\text{TiO}_2$  are displayed in Figure S1.

#### 2. Total and partial density of states of high-pressure $\text{TiO}_2$ phases.

To further understand the band gap reduction in fluorite  $\text{TiO}_2$ , the density of states (DOSs) for of baddeleyite, columbite, orthorhombic, cotunnite, pyrite, and fluorite  $\text{TiO}_2$  were calculated, as shown in Figure S2. For all these systems, the valence band (VB) of high-pressure phase of  $\text{TiO}_2$  consists mainly of the O-2p states, whereas the conduction band (CB) is dominated by the Ti-3d states. It is found that the Ti-3d states in the CB of cubic fluorite  $\text{TiO}_2$  split into  $e_g$  and  $t_{2g}$  states.

### 3. Optical absorption properties of fluorite and rutile TiO<sub>2</sub>.

The optical absorption property of fluorite TiO<sub>2</sub> has been evaluated through the frequency-dependent imaginary part of the dielectric tensor  $\varepsilon_2(\omega)$  and the corresponding result of rutile TiO<sub>2</sub> is also displayed in Figure S2 for comparison. The results indicate that the fluorite TiO<sub>2</sub> is visible-light active due to its reduced band gap.

### 4. Slab models of rutile TiO<sub>2</sub>(110), rutile TiO<sub>2</sub>(011), pyrite TiO<sub>2</sub>(111), and fluorite TiO<sub>2</sub>(111) surfaces.

The TiO<sub>2</sub> surfaces were modeled by the periodic slabs with a vacuum region of 10 Å to minimize the interactions between the neighboring atomic layers. The top and side views of the four-layer slabs for rutile TiO<sub>2</sub>(110), rutile TiO<sub>2</sub>(011), pyrite TiO<sub>2</sub>(111), and fluorite TiO<sub>2</sub>(111) surfaces were displayed in Figure S4. For the geometry optimization, a 5×5×1 *k*-point mesh was used and all the atoms were allowed to relax. The surface energy is defined as:

$$E_{surf} = \frac{E_{slab} - NE_{bulk}}{2A}, \quad (1)$$

Where  $E_{slab}$  is the total energy of slab.  $E_{bulk}$  is the total energy of per repeating cell of bulk crystal and the slab containing  $N$  repeating cell.  $A$  is the surface area of the slab.

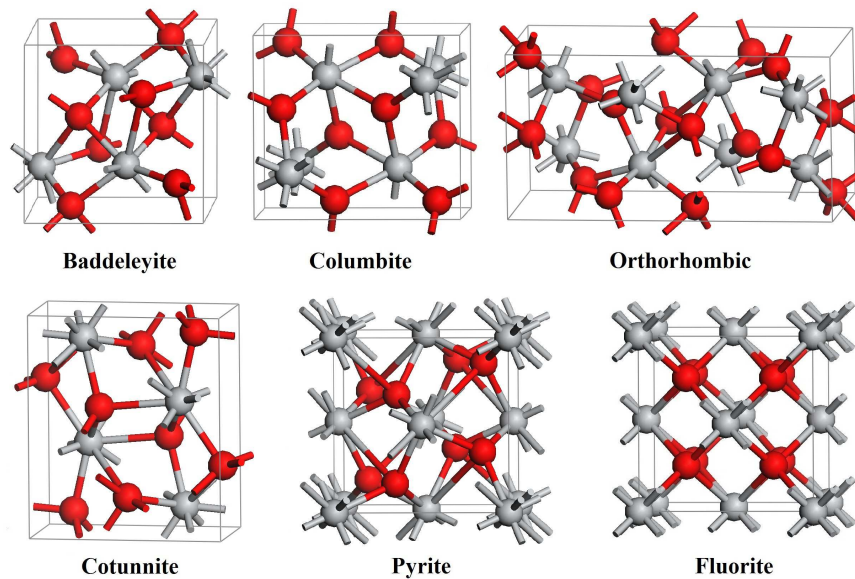

**Figure S1.** Atomic structures of baddeleyite, columbite, orthorhombic, cotunnite, pyrite, and fluorite  $\text{TiO}_2$  crystals. The gray and red spheres represent the Ti and O atoms, respectively.

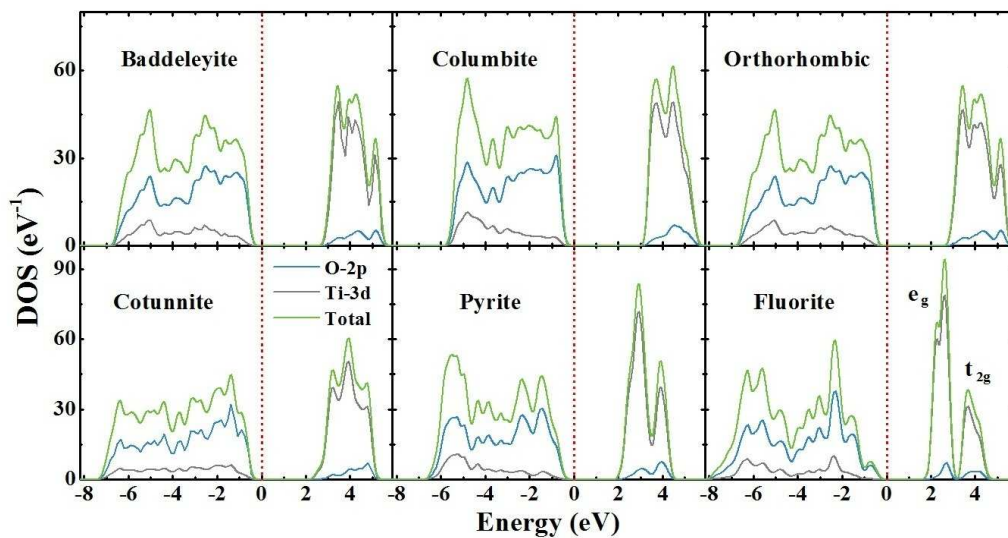

**Figure S2.** HSE06 calculated total and partial DOSs of baddeleyite, columbite, orthorhombic, cotunnite, pyrite, and fluorite  $\text{TiO}_2$ . The Fermi level of these high-pressure phases of  $\text{TiO}_2$  is displayed with a red dashed line.

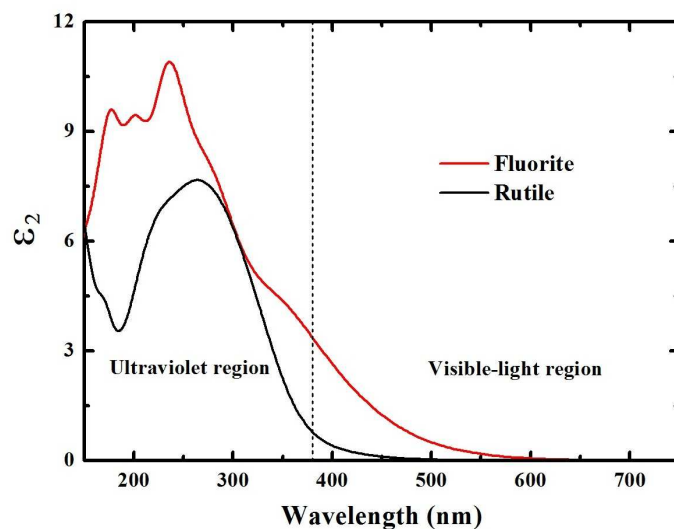

**Figure S3.** The imaginary part of the dielectric function ( $\epsilon_2$ ) for bulk rutile and fluorite  $\text{TiO}_2$ , calculated with HSE06 functional. The present data were averaged over the three ( $x$ ,  $y$ , and  $z$ ) polarization vectors.

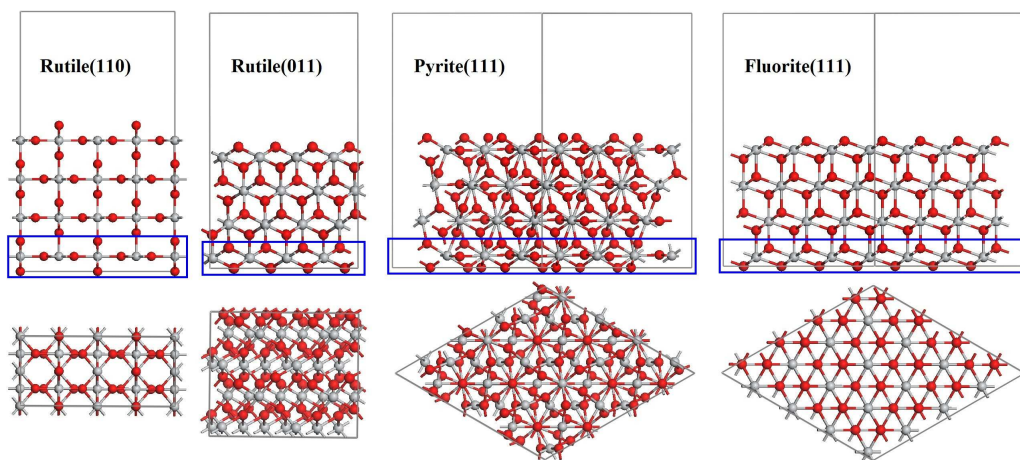

**Figure S4.** The side and top views of the four-layer slabs for rutile  $\text{TiO}_2(110)$ , rutile  $\text{TiO}_2(011)$ , pyrite  $\text{TiO}_2(111)$ , and fluorite  $\text{TiO}_2(111)$  surfaces. The gray and red spheres represent the Ti and O atoms, respectively. The repeat unit layer of these  $\text{TiO}_2$  slabs is illustrated in the blue rectangle. A vacuum region of  $10\text{\AA}$  was used in these slab models.
